# Supplementary material for: A drone-based sampling platform for vertically resolved chemical characterization of aerosol particles using chemical ionization mass spectrometry
Source: Copernicus journal article supplement (doi:10.5194/egusphere-2025-5857), 2025-12-15
Supplement: Supplementary file 1 [file egusphere-2025-5857-supplement.pdf]

# Supporting Information: A drone-based sampling platform for vertically resolved chemical characterization of aerosol particles using chemical ionization mass spectrometry

Leo Håkansson<sup>1</sup>, Epameinondas Tsiligiannis<sup>1</sup>, and Cheng Wu<sup>1</sup>

<sup>1</sup>Department of Chemistry and Molecular Biology, University of Gothenburg, Sweden

**Correspondence:** Cheng Wu (cheng.wu@gu.se)

**Table S1.** Summary of measurements

| Measurement                      | Height MAGL | Description                                                                                                                                               | Date           |
|----------------------------------|-------------|-----------------------------------------------------------------------------------------------------------------------------------------------------------|----------------|
| Hovering                         | 8           | Comparison of drone and ground-based while drone is hovering, simultaneous stationary and drone based sensor measurements                                 | 11 May 2025    |
| Grounded                         | 2           | Comparison of drone and ground-based while drone is grounded                                                                                              | 10 May 2025    |
| Vertical profile test            | 2–120       | Vertical profiles of T, RH, wind speed and direction between 19:30 and 02:30                                                                              | 24 Apr 2024    |
| Nocturnal boundary layer profile | 2–120       | Vertical profiles of T, RH, wind speed and direction during the nocturnal boundary layer profiling, simultaneous ground and drone based filter collection | 14–15 Apr 2025 |

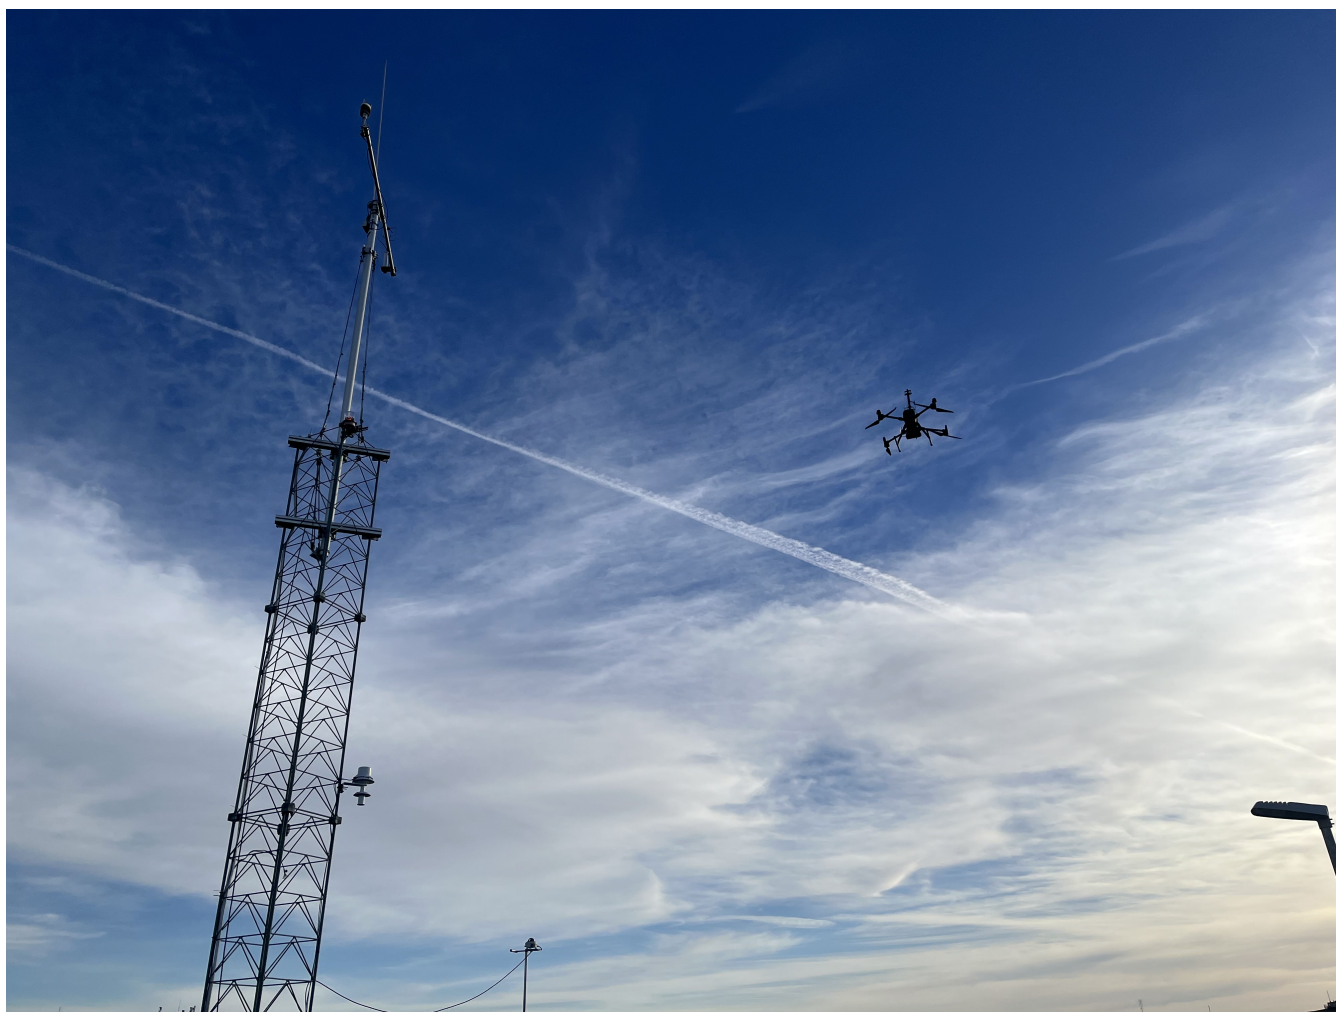

**Figure S1.** Drone setup used in comparison measurements. On the left: Natrium Atmospheric and climate measurement tower.

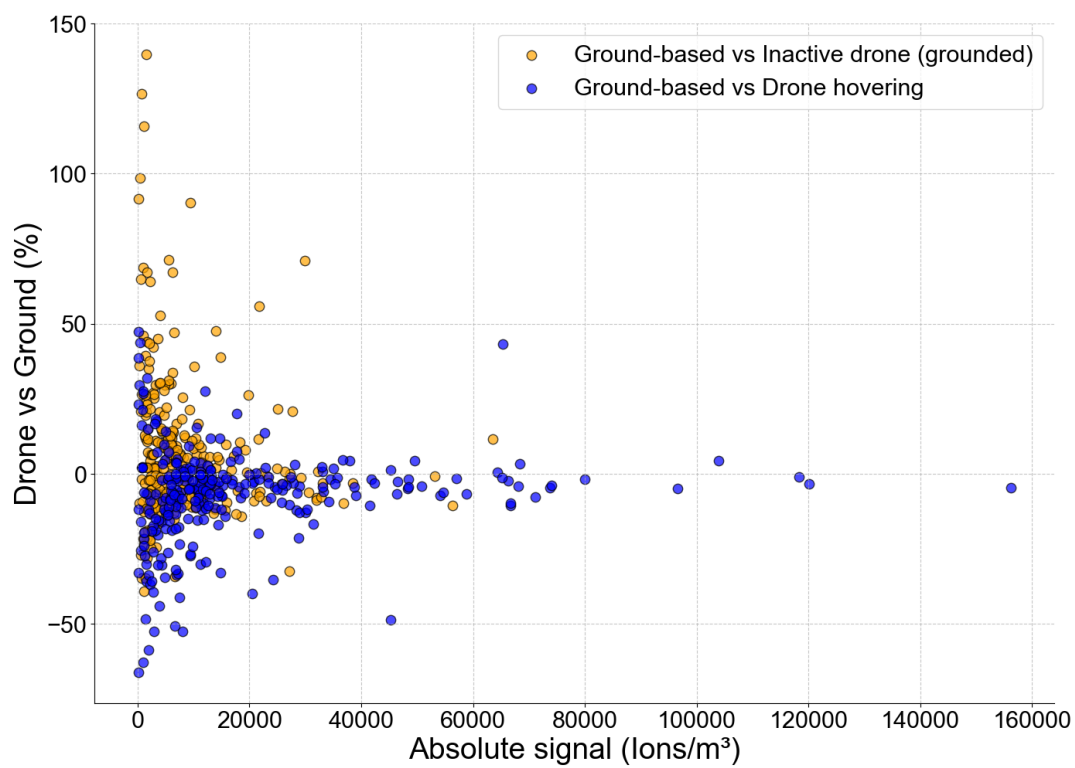

**Figure S2.** Distribution of relative difference between drone and ground-based measurements ( $((\text{drone-ground})/\text{ground})$ ) as a function of absolute signal of ground-based measurements.
